# Supplementary material for: Effects of Four Photo-Selective Colored Hail Nets on an Apple in Loess Plateau, China
Source: MDPI journal article supplement (doi:10.3390/horticulturae9091061), 2023-09-21
Supplement: s1 [file s1]

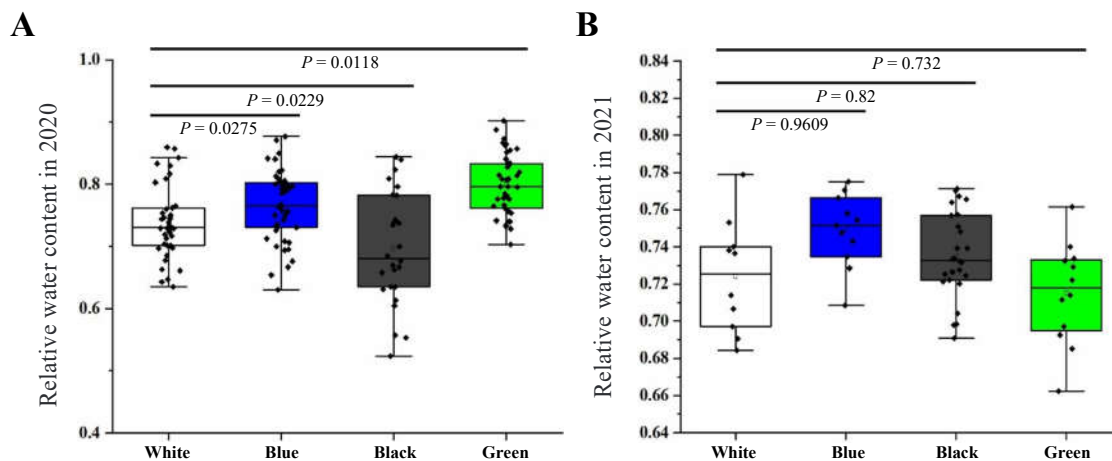

**Figure S1.** The relative water content of leaves treated with different photo-selective colored nets. **(A)** The leaf relative water content in 2020. **(B)** The leaf relative water content in 2021.  $p$  values from Tukey's test.

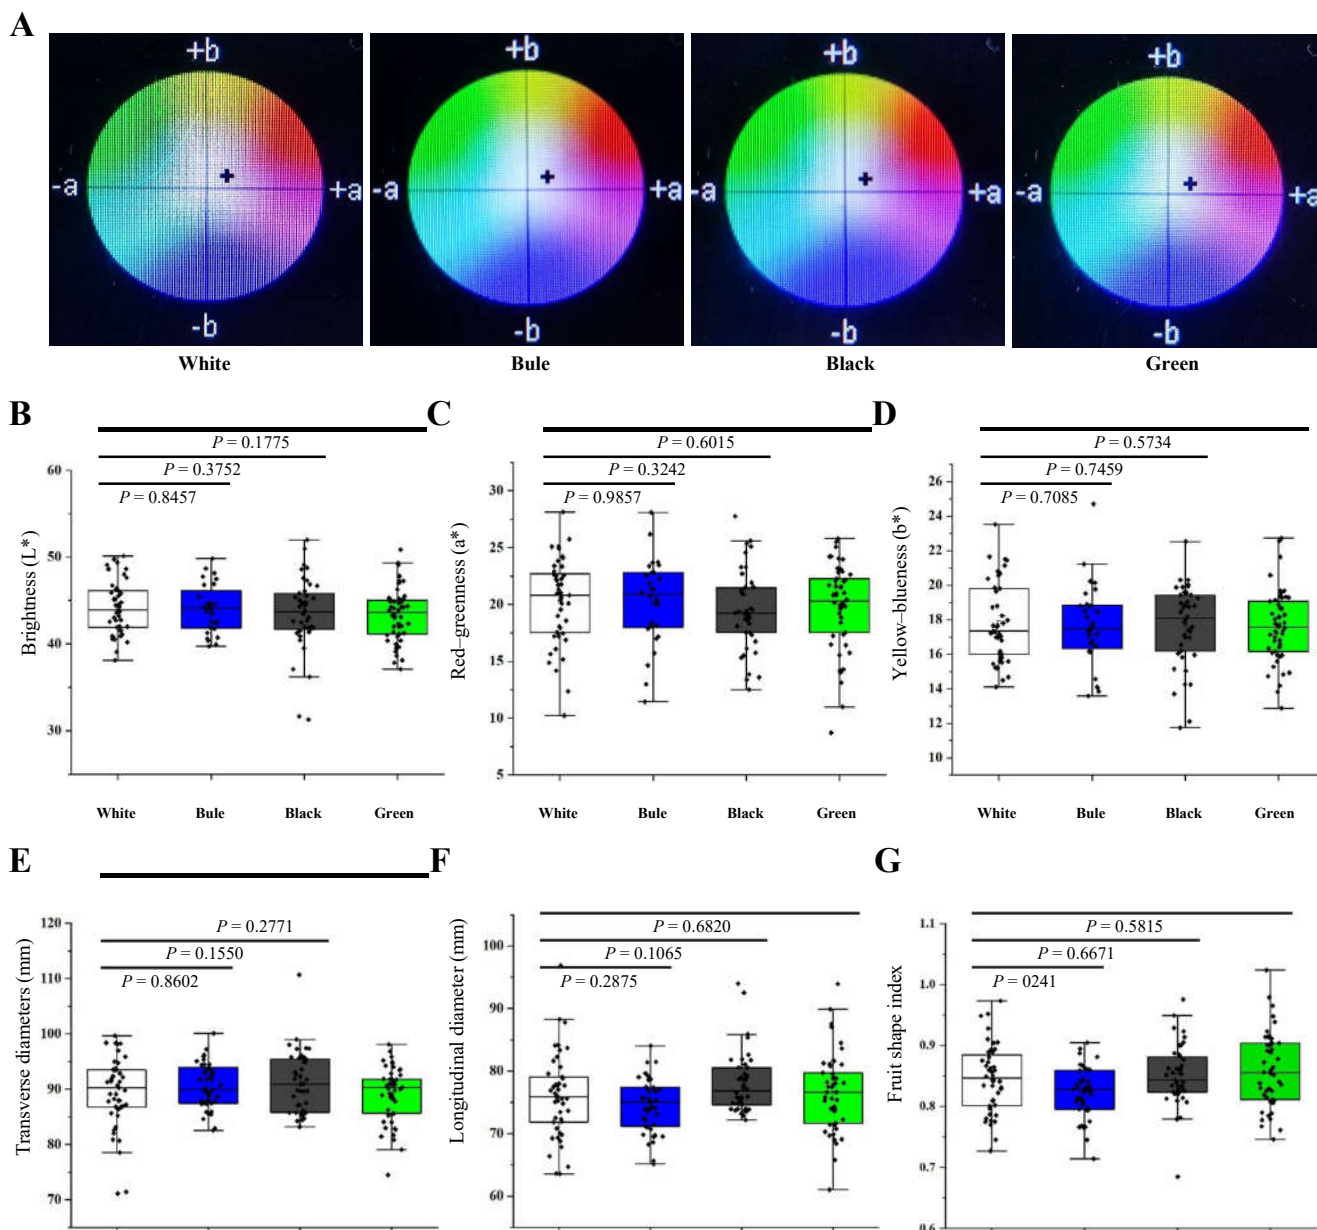

**Figure S2.** The combined effects of photo-selective colored nets on the external qualities of apple fruits at harvest in 2020. (A) Visualization example diagram depicting the results of the colorimeter measurements. (B–G) Measurement of (B) brightness, (C) red–greenness, (D) yellow–bluesness, (E) fruit equatorial diameter, (F) fruit longitudinal diameter, and (G) fruit shape index of fruits covered with different photo-selective colored nets. Each fruit was measured in five directions. *p* values from Tukey’s test.

A

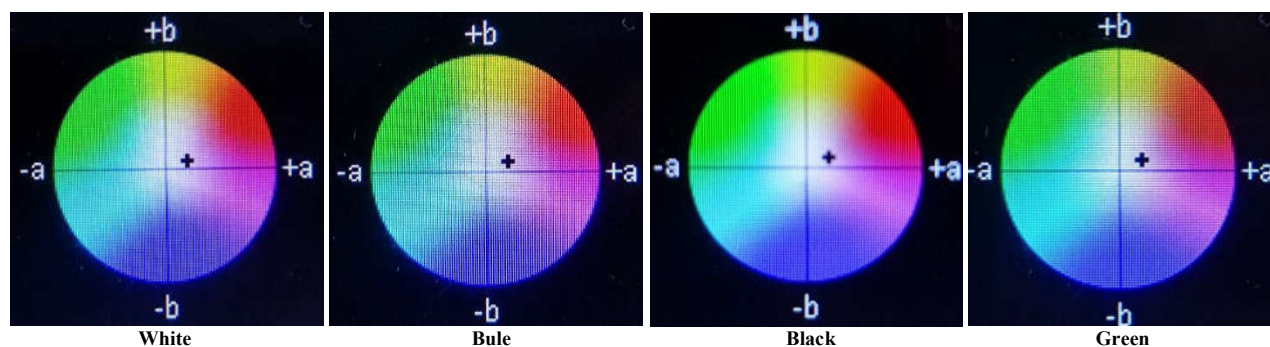

B

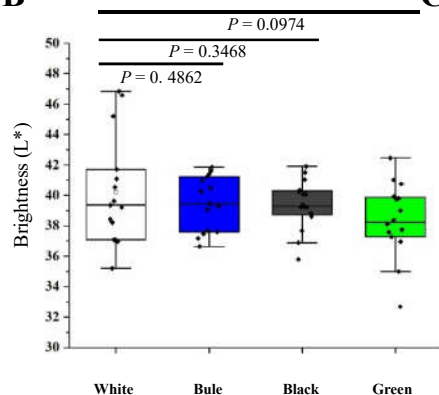

C

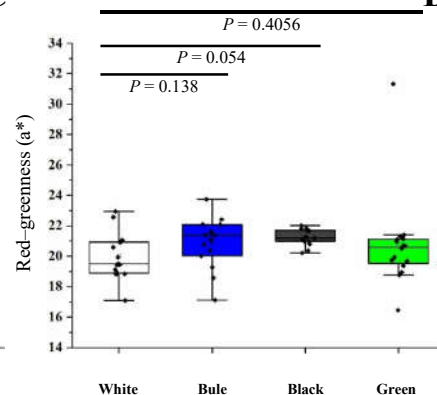

D

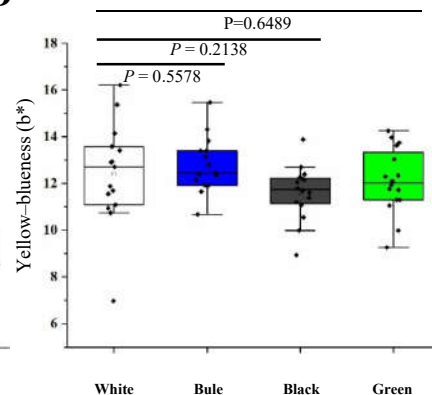

E

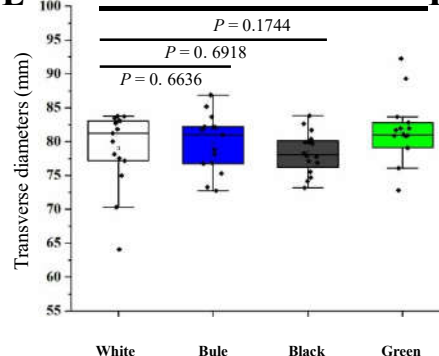

F

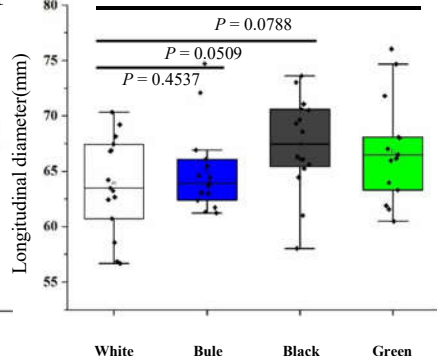

G

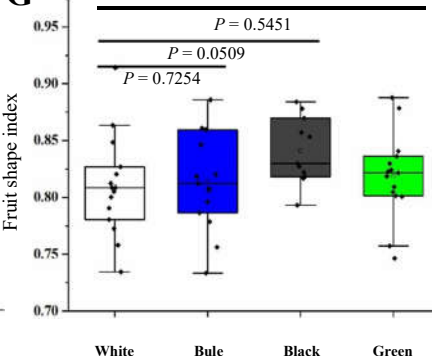

**Figure S3.** The combined effects of photo-selective colored nets on the external qualities of apple fruits at harvest in 2021. (A) Visualization example diagram depicting the results of the colorimeter measurements. (B–G) Measurement of (B) brightness, (C) red–greenness, (D) yellow–blueness, (E) fruit equatorial diameter, (F) fruit longitudinal diameter, and (G) fruit shape index of fruits covered with different photo-selective colored nets. Each fruit was measured in four directions. *p* values from Tukey’s test.

**Table S1.** The effects of photo-selective colored nets on relative humidity and air temperature. Apple orchards under photo-selective white, blue, black, and green nets. The photo-selective nets were installed at a height of 5 meters above the ground in a ridge-connected structure.

|              | <b>Relative<br/>Humidity</b> | <b>Air<br/>Temperature</b> |
|--------------|------------------------------|----------------------------|
| White net    | 45.77 ± 1.05                 | 30.88 ± 0.64               |
| Blue net     | 45.43 ± 1.02                 | 30.83 ± 0.80               |
| Black net    | 44.73 ± 0.80                 | 30.89 ± 0.53               |
| Green net    | 43.88 ± 1.35                 | 30.48 ± 0.45               |
| Significance | NS                           | NS                         |

NS: no significance ( $p > 0.05$ ).
